# Supplementary material
Source: publisher site journal article supplement (https://www.dovepress.com/article/338135)
Supplement: Supplementary file 1 [file get_supplementary_file.php]

## Supplementary materials

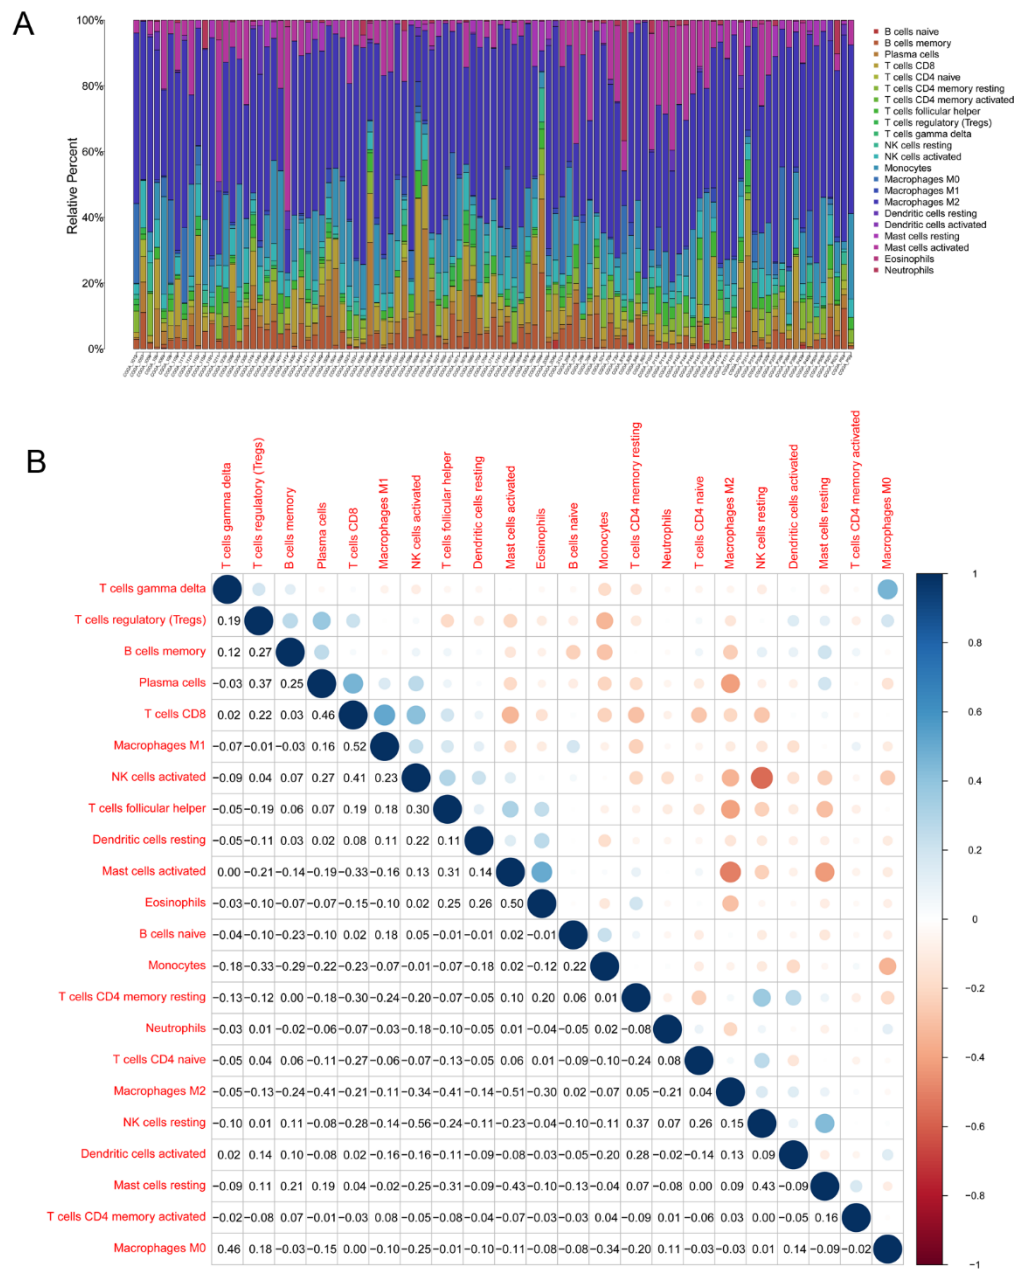

**Figure S1:** TICs profiles of validation data set.

(A) Barplot showing the relative levels of 22 TIC subtypes in tumor tissue of validation data set.

(B) Heat map showing the correlation analysis of 22 TIC subtypes. The number and color in the circles indicate the correlation coefficient between two different TIC subtype.

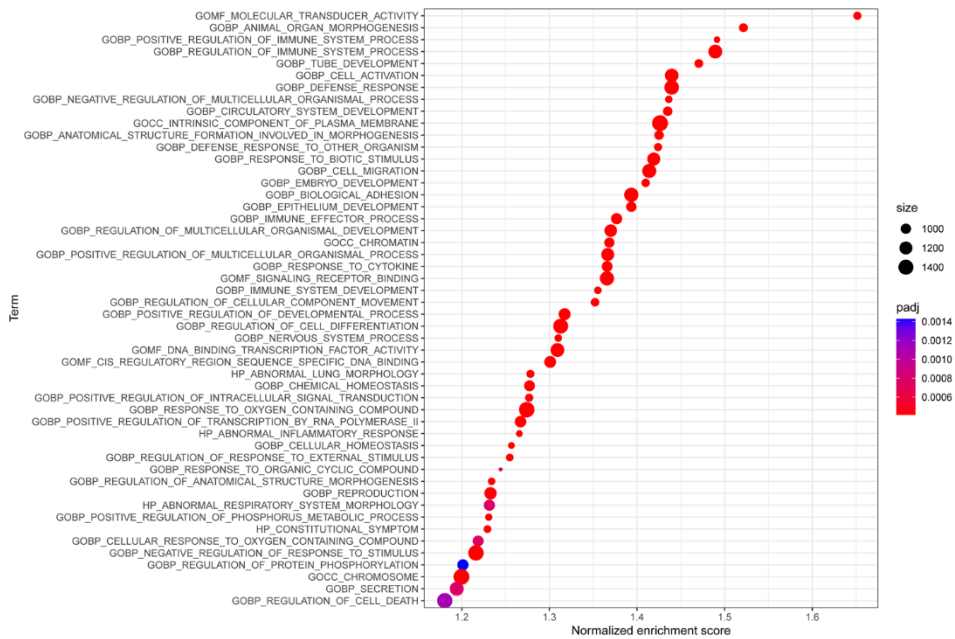

**Figure S2:** Bubble plots showing the enriched terms based on GSEA analysis ranked by p-value in the high-RS group of validation data set.

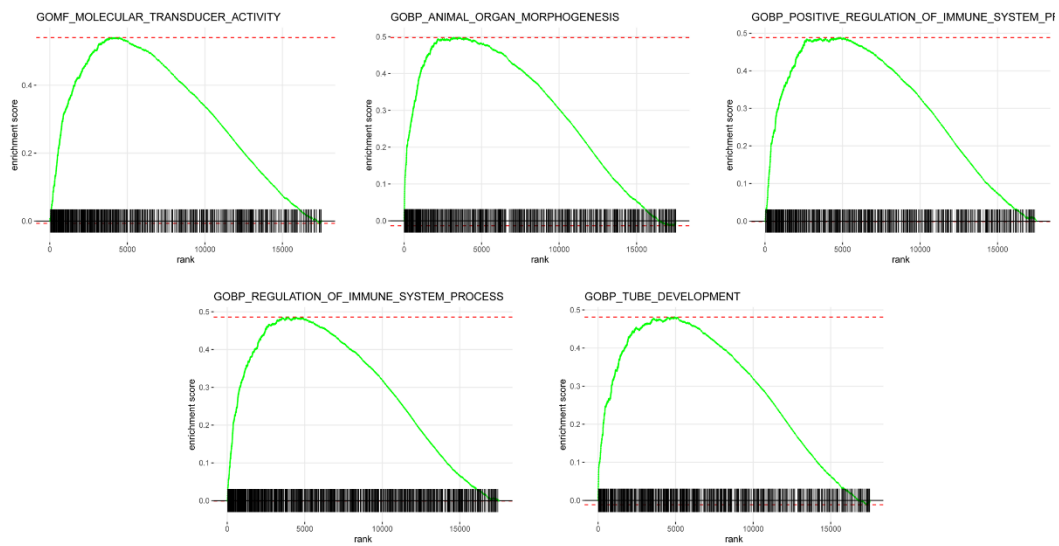

**Figure S3:** Top five enriched terms based on GSEA analysis in the high-RS group of validation data set.
